# Supplementary material for: Trace Cd2+ Ions Detection on the Flower-Like Ag@CuO Substrate
Source: PubMed Central journal article supplement (PMC7558543; doi:10.3390/nano10091664), 2020-08-25
Supplement: nanomaterials-10-01664-s001.pdf [file nanomaterials-10-01664-s001.pdf]

## Supplementary Materials:

# Trace Cd<sup>2+</sup> Ions Detection on the Flower-Like Ag@CuO Substrate

Mingming Cheng <sup>1,2</sup>, Chenyan Li <sup>1,2</sup>, Weijun Li <sup>1,2</sup> and Yingkai Liu <sup>1,2,\*</sup>

<sup>1</sup> Yunnan Key Laboratory of Opto-electronic Information Technology, Yunnan Normal University, Kunming 650500, China; Chengminng0526@126.com (M.C.); Lichenyan12@126.com (C.L.); Liweijun0009@126.com (W.L.)

<sup>2</sup> Institute of Physics and Electronic Information, Yunnan Normal University, Kunming 650500, China

\* Correspondence: ykliu@ynnu.edu.cn; Tel.: +86-871-6594-1166

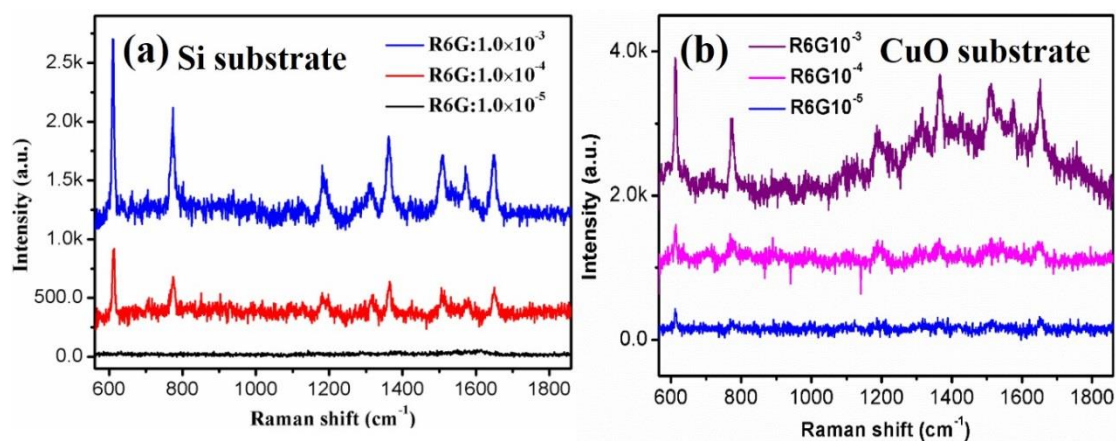

**Figure S1.** Surface enhanced Raman scattering (SERS) spectra of rhodamine 6G (R6G) with different concentrations on the different substrates. (a)  $1.0 \times 10^{-3}$ – $1.0 \times 10^{-5}$  M on the CuO flower-like material (FM) substrate; (b)  $1.0 \times 10^{-3}$ – $1.0 \times 10^{-5}$  M on the silicon substrate.

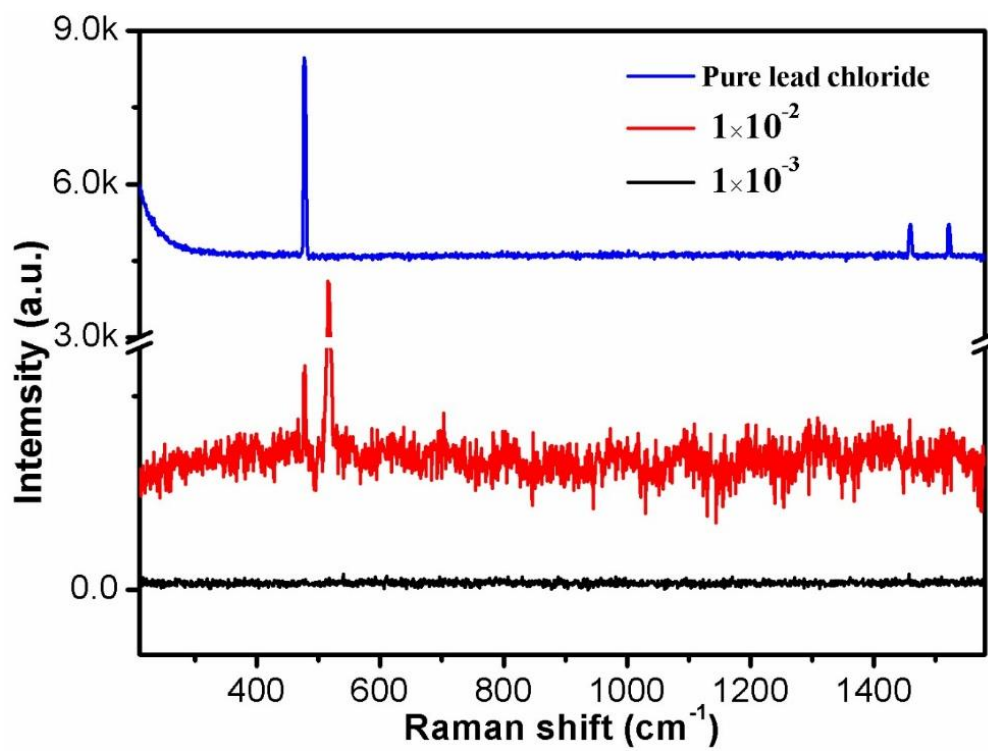

Figure S2. SERS spectra of lead chloride at different concentrations.
